# Supplementary material for: Drug-induced reactive oxygen species (ROS) rely on cell membrane properties to exert anticancer effects
Source: PubMed Central journal article supplement (PMC4899687; doi:10.1038/srep27439), 2016-06-09
Supplement: srep27439-s1.pdf [file srep27439-s1.pdf]

## Drug-induced reactive oxygen species (ROS) rely on cell membrane properties to exert anticancer effects.

Hamid R. Molavian<sup>1,\*,#</sup>, Aaron Goldman<sup>2,3,4,#</sup>, Colin J. Phipps<sup>1</sup>, Mohammad Kohandel<sup>1,\*</sup>, Bradly G. Wouters<sup>5,6</sup>, Shiladitya Sengupta<sup>2,3,4</sup> and Sivabal Sivaloganathan<sup>1,7</sup>

### Mathematical Model

We use the chemical reactions for detoxifying H<sub>2</sub>O<sub>2</sub> by catalase and glutathione peroxidase to derive the steady state concentration of H<sub>2</sub>O<sub>2</sub> as a function of the other involved species.

Here we denote the intracellular concentrations of GSH, GPX1, GPX0, [GS-GPX], H<sub>2</sub>O<sub>2</sub> and catalase by  $C_{gsh}$ ,  $C_{gpx1}$ ,  $C_{gpx0}$ ,  $C_{gsgpx}$ ,  $C_{h2o2}$  and  $C_{cat}$  respectively, and the total intracellular production rate of H<sub>2</sub>O<sub>2</sub> by  $P_{h2o2}$ . Assuming constant concentrations of catalase and GSH are maintained, the kinetic equations, based on the aforementioned chemical reactions, for H<sub>2</sub>O<sub>2</sub>, GPX1, GPX0, and [GS-GPX] read,

$$\frac{dC_{h2o2}}{dt} = -k_1 C_{gpx1} C_{h2o2} - k_{cat} C_{cat} C_{h2o2} + P_{h2o2} \quad (1A)$$

$$\frac{dC_{gpx1}}{dt} = -k_1 C_{gpx1} C_{h2o2} + k_3 C_{gsh} C_{gsgpx} \quad (2A)$$

$$\frac{dC_{gpx0}}{dt} = k_1 C_{gpx1} C_{h2o2} - k_2 C_{gsh} C_{gpx0} \quad (3A)$$

$$\frac{dC_{gsgpx}}{dt} = -k_3 C_{gsgpx} C_{gsh} + k_2 C_{gsh} C_{gpx0}. \quad (4A)$$

Here and in the remainder of the paper we use the same notation as Ref. [15] and thus we automatically consider any synergistic effects between catalase and glutathione peroxidase.

The total production rate of H<sub>2</sub>O<sub>2</sub> inside the cell,  $P_{h2o2}$ , can be written as follows (Eq. (2)),

$$P_{h2o2} = P_{h2o2}^{int} + P_{h2o2}^{ext} = P_{h2o2}^{int} + \mu \frac{A}{V} (C_{h2o2}^{ext} - C_{h2o2}), \quad (5A)$$

We are interested in finding the steady state solutions of Eqs. (1A) to (4A) where the production rate is given by Eq. (5A). We set the time derivatives equal to zero and solve equations (1A) to (4A), to obtain the following equation,

$$C_{h2o2} = \frac{P_{h2o2}}{k_1 C_{gpx1} + k_{cat} C_{cat}} = \frac{P_{h2o2}^{int} + \mu \frac{A}{V} (C_{h2o2}^{ext} - C_{h2o2})}{k_1 \left( C_{gpx}^0 - \frac{P_{h2o2}^{int} + \mu \frac{A}{V} (C_{h2o2}^{ext} - C_{h2o2}) - k_{cat} C_{cat} C_{h2o2}}{k_2 C_{gsh}} \right) + k_{cat} C_{cat}} \quad (6A)$$

This equation can be rearranged to give the following quadratic equation for H<sub>2</sub>O<sub>2</sub> in terms of the other parameters involved,

$$\alpha (C_{h2o2})^2 + \beta C_{h2o2} - \gamma = 0 \quad (7A)$$

$$\begin{cases} \alpha = k_1(k_{cat}C_{cat} + \frac{A}{V}\mu) \\ \beta = k_1k_2C_{gpx}^0C_{gsh} + k_2(k_{cat}C_{cat} + \mu)C_{gsh} - k_1(P_{h2o2}^{int} - \frac{A}{V}\mu C_{h2o2}^{ext}) \\ \gamma = k_2(P_{h2o2}^{int} - \frac{A}{V}\mu C_{h2o2}^{ext})C_{gsh} \end{cases}$$

We can analytically solve this quadratic equation to obtain the following expression for the concentration of H<sub>2</sub>O<sub>2</sub>,

$$C_{h2o2} = \frac{|k_1k_2C_{gpx}^0C_{gsh} + k_2(k_{cat}C_{cat} + \mu)C_{gsh} - k_1(P_{h2o2}^{int} - \frac{A}{V}\mu C_{h2o2}^{ext})|}{2k_1(k_{cat}C_{cat} + \mu)} \left( \sqrt{1 + \frac{4\alpha\gamma}{\beta^2}} - \text{sgn}(\beta) \right) \quad (8A)$$

In the limit of high concentrations of H<sub>2</sub>O<sub>2</sub>, which is of particular interest to us, Eq. (8A) can be reduced to

$$C_{h2o2} = \frac{k_1\frac{A}{V}\mu C_{h2o2}^{ext} + k_1P_{h2o2}^{int} - k_2(k_{cat}C_{cat} + \frac{A}{V}\mu)C_{gsh} - k_1k_2C_{gpx}^0C_{gsh}}{k_1(k_{cat}C_{cat} + \frac{A}{V}\mu)} \quad (9A)$$

### Supplemental Figure

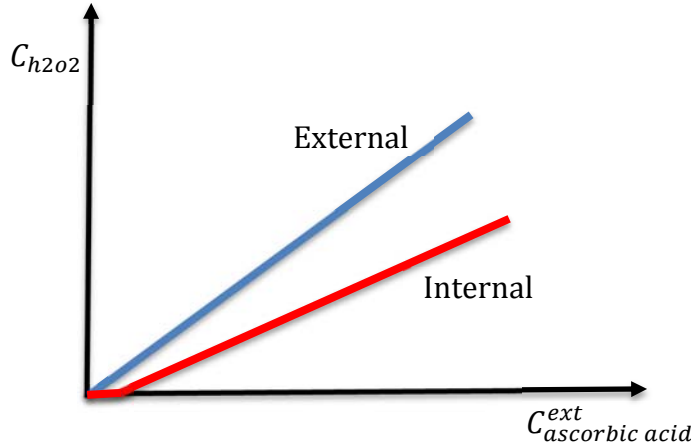

Fig. 1S: Concentration of external extracellular (blue) H<sub>2</sub>O<sub>2</sub> and intracellular H<sub>2</sub>O<sub>2</sub> as a function of the concentration of ascorbic acid.

### Supplemental Table

Table 1S: List of reaction rates.

| $k_{cat}$                      | $k_1$                          | $k_2$                        | $k_3$                        |
|--------------------------------|--------------------------------|------------------------------|------------------------------|
| $1.0 \times 10^7 M^{-1}s^{-1}$ | $2.1 \times 10^7 M^{-1}s^{-1}$ | $4 \times 10^4 M^{-1}s^{-1}$ | $1 \times 10^7 M^{-1}s^{-1}$ |
